# Supplementary material for: A chameleon-inspired stretchable electronic skin with interactive colour changing controlled by tactile sensing
Source: PubMed Central journal article supplement (PMC4560774; doi:10.1038/ncomms9011), 2015-08-24
Supplement: ncomms9011-s1.pdf [file ncomms9011-s1.pdf]

## Supplementary Information

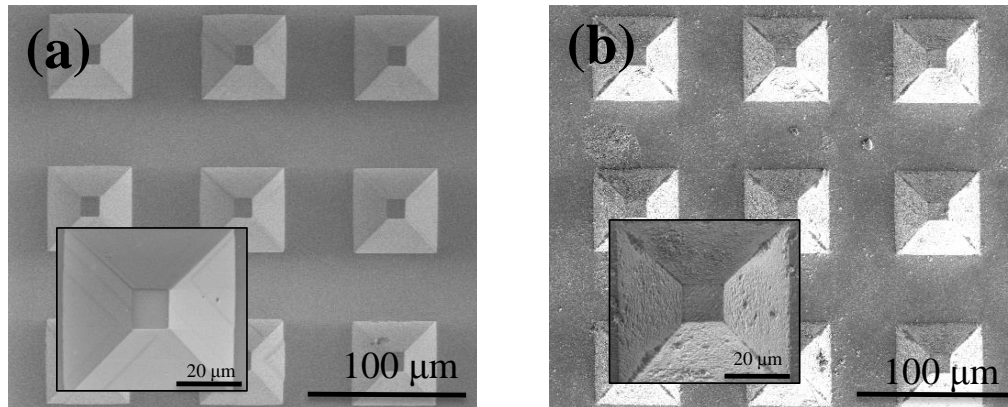

**Supplementary Figure 1. The SEM images of the pressure sensor.** (a) The SEM image of the pre-prepared pyramidal microstructured PDMS substrate. (b) The SEM image of the SWNT spray-coated pyramidal microstructured PDMS substrate.

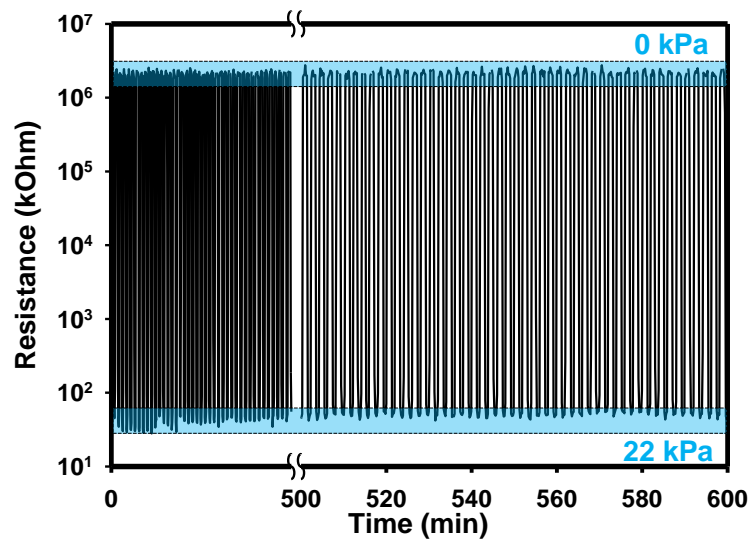

**Supplementary Figure 2. The multiple cyclic data of PS-10.** The resistance of the pressure sensor remained consistent at both 0 kPa ( $\sim 2 \times 10^6$  kOhm) and 22 kPa ( $\sim 50$  kOhm) after over 300 cycles. Each cycle takes about 2 minutes.

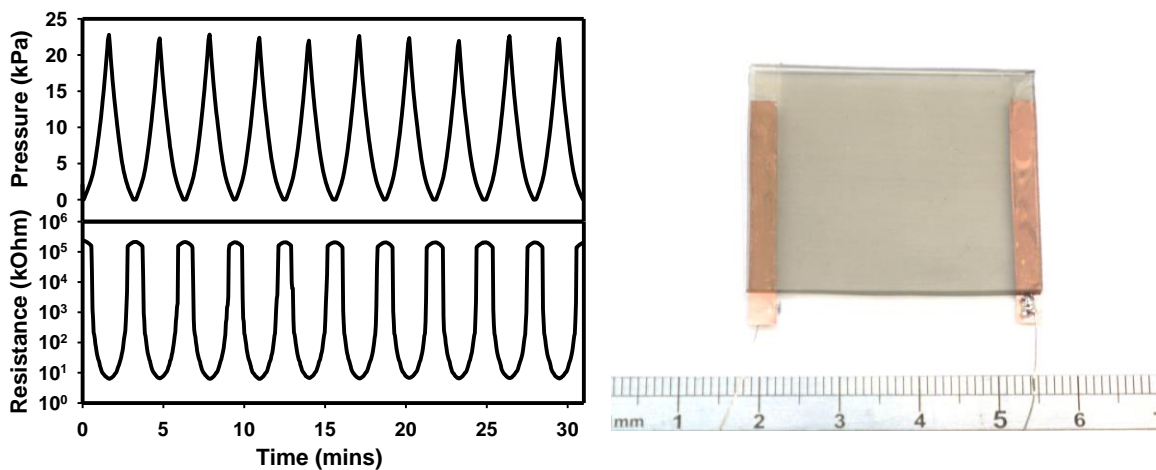

**Supplementary Figure 3. The characteristic and photo of the  $3 \times 3 \text{ cm}^2$  pressure sensor.** The resistance response of the large area pressure sensor and its photo with proportional scale.

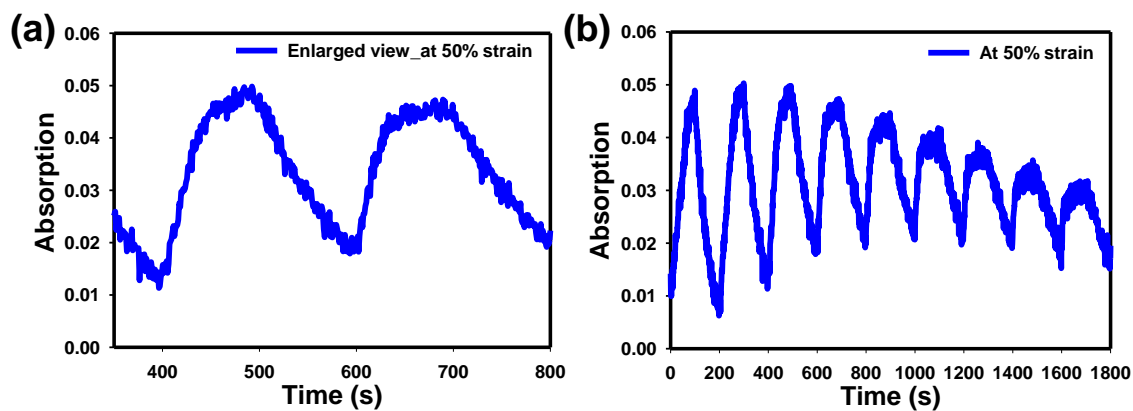

**Supplementary Figure 4. The properties of the transranet and stretchable polymer-based electrochromic devices.** (a) The enlarged spectra of a single switching cycle at 50% strain. (b) The cyclic switching at 50% strain.

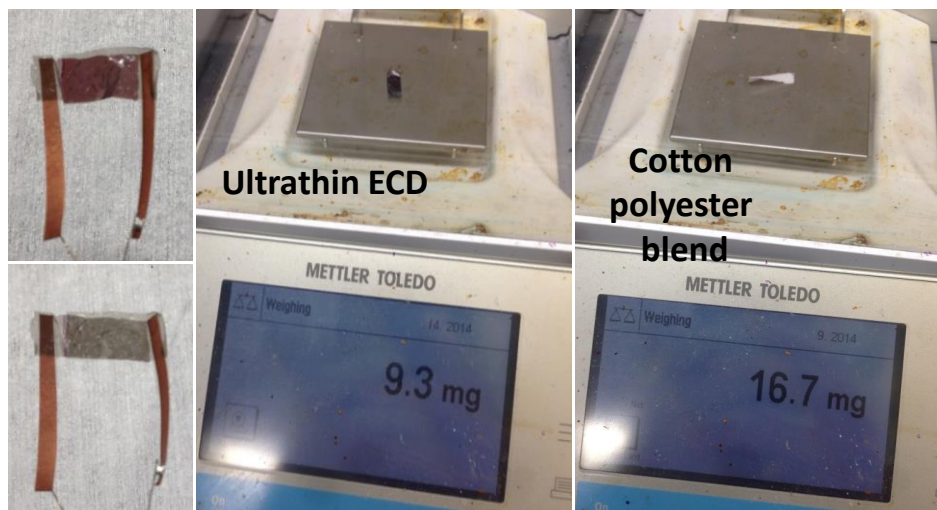

**Supplementary Figure 5. The ultrathin ECDs and the weight of the ECD and a piece of cotton polyester. The size of the conventional textile is similar to that of ultrathin ECDs.**
